# Supplementary material
Source: PubMed Central journal article supplement (PMC4788061)
Supplement: barp800029.ww1_default.pdf [file barp800029.ww1_default.pdf]

# **Effectiveness and cost-effectiveness of cardiovascular disease prevention in whole populations: modelling study**

Barton et al

## **APPENDICES**

### APPENDIX A

CVD event types and additional mortality in first and subsequent years for a 65-year-old man

### APPENDIX B

CVD event types – costs and quality of life effects for a 65-year-old man

### APPENDIX C

CVD events – Discounted effects for a 65-year-old man

### APPENDIX D

Discounted results for 65-year-old men, according to baseline 10 year CVD risk

### APPENDIX E

Discounted estimates of effects for an intervention with relative risk reduction of 10%

### APPENDIX F

Discounted estimates of total England and Wales population effects for an intervention with relative risk reduction of 10% sustained over 10 years

### APPENDIX G

Maximum acceptable cost (£million per programme) for intervention with given relative risk

### APPENDIX H

Maximum acceptable cost (£million per programme) for intervention with given percentage reduction in systolic blood pressure

### APPENDIX I

Maximum acceptable cost (£million per programme) for intervention with given percentage reduction in cholesterol

### APPENDIX J

Estimated outcomes following a first CVD event.

### Appendix K

Estimated outcomes for women experiencing a primary CVD event

### APPENDIX L

Population estimates for England and Wales: numbers eligible for primary prevention

### APPENDIX M

Illustrative calculations for 65-year-old male with a 12.5% 10-year CVD risk

### APPENDIX N

Undiscounted outcomes for 65-year-old male with a 12.5% 10-year CVD risk

#### APPENDIX O

Discounted outcomes for 65-year-old male with a 12.5% 10-year CVD risk

#### APPENDIX P.

LIFE EXPECTANCY CALCULATIONS

#### APPENDIX Q..

SENSITIVITY ANALYSIS: Discounted outcomes for an intervention achieving a given relative risk reduction sustained over 10 years (all background risks INCREASED by 5%)

#### APPENDIX R

SENSITIVITY ANALYSIS: Discounted outcomes for an intervention achieving a given relative risk reduction sustained over 10 years (all background risks multiplied by 1.5)

#### APPENDIX S

SENSITIVITY ANALYSIS: Discounted outcomes for an intervention achieving a given relative risk reduction sustained over 10 years (all background risks REDUCED by 5%)

#### APPENDIX T

SENSITIVITY ANALYSIS: Discounted outcomes for an intervention achieving a given relative risk reduction sustained over 10 years (all background risks multiplied by 0.5, ie halved)

#### APPENDIX U

Principles of the SchARR model incorporated into this modelling.

# Effectiveness and cost-effectiveness of cardiovascular disease prevention in whole populations: modelling study

Pelham Barton, Lazaros Andronis, Andrew Briggs, Klim McPherson, Simon Capewell

## APPENDICES

### Appendix A

CVD event types and additional mortality in first and subsequent years for a 65-year-old man

| Event type            | Proportion | Additional mortality |             |
|-----------------------|------------|----------------------|-------------|
|                       |            | First year           | Later years |
| Stable Angina         | 0.214      | 0.0070               | 0.0070      |
| Unstable Angina       | 0.083      | 0.1077               | 0.0124      |
| Myocardial Infarction | 0.173      | 0.0626               | 0.0159      |
| Fatal CHD             | 0.097      | 0                    | 0           |
| TIA                   | 0.100      | 0.0348               | 0.0348      |
| Stroke                | 0.270      | 0.0520               | 0.0208      |
| Fatal CVD (ex CHD)    | 0.063      | 0                    | 0           |

Sources: Ward et al (2005), pages 138, 142.

## Appendix B

### CVD event types – costs and quality of life effects for a 65-year-old man

| Event type            | Proportion | Costs following event |           | QoL following event |
|-----------------------|------------|-----------------------|-----------|---------------------|
|                       |            | First year            | Later yrs |                     |
| Stable Angina         | 0.214      | £232                  | £232      | 0.808               |
| Unstable Angina       | 0.083      | £541                  | £232      | 0.770               |
| Myocardial Infarction | 0.173      | £5,244                | £232      | 0.760               |
| Fatal CHD             | 0.097      | £1,341                | 0         | 0                   |
| TIA                   | 0.100      | £1,224                | £304      | 1.000               |
| Stroke                | 0.270      | £9,259                | £2,489    | 0.629               |
| Fatal CVD (ex CHD)    | 0.063      | £8,102                | 0         | 0                   |

Sources: Ward et al (2005), pages 146, 153. Costs following event have been inflated to 2008, except where GP contact costs have been identified, in which case the updated PSSRU cost has been used.

## Appendix C

### CVD events – Discounted effects for a 65-year-old man

| Event type            | Proportion | Life Years lost | QALY lost | Lifetime costs |
|-----------------------|------------|-----------------|-----------|----------------|
| Stable Angina         | 0.214      | 0.76            | 2.12      | £2,338         |
| Unstable Angina       | 0.083      | 1.91            | 3.11      | £2,380         |
| Myocardial Infarction | 0.173      | 1.89            | 3.17      | £7,088         |
| Fatal CHD             | 0.097      | 10.84           | 8.50      | £1,341         |
| TIA                   | 0.100      | 2.97            | 2.33      | £3,313         |
| Stroke                | 0.270      | 2.19            | 4.16      | £28,307        |
| Fatal CVD (ex CHD)    | 0.063      | 10.84           | 8.50      | £8,102         |
| Overall               | 1.00       | 3.27            | 4.00      | £10,539        |

## Appendix D

### Discounted results for 65-year-old men, according to baseline 10 year CVD risk

| 10-year risk   | proportion | Cases prevented | Deaths prevented | Life Years gained | QALY gain    | Cost saved  |
|----------------|------------|-----------------|------------------|-------------------|--------------|-------------|
| 0.075          | 0.010      | 0.00551         | 0.00083          | 0.0164            | 0.0193       | £56         |
| 0.125          | 0.088      | 0.00906         | 0.00138          | 0.0271            | 0.0319       | £92         |
| 0.175          | 0.197      | 0.01251         | 0.00191          | 0.0376            | 0.0444       | £127        |
| 0.225          | 0.223      | 0.01579         | 0.00242          | 0.0477            | 0.0564       | £160        |
| 0.275          | 0.153      | 0.01892         | 0.00291          | 0.0573            | 0.0681       | £192        |
| 0.325          | 0.329      | 0.02189         | 0.00339          | 0.0666            | 0.0793       | £223        |
| <b>Overall</b> |            | <b>0.0169</b>   | <b>0.0026</b>    | <b>0.051</b>      | <b>0.061</b> | <b>£172</b> |

## Appendix E

Discounted estimates of effects for an intervention with relative risk reduction of 10% for age groups between 40 and 79 years, both men and women

| Per 1000             | Cases prevented | Deaths prevented | LY gain     | QALY gain   | Savings         |
|----------------------|-----------------|------------------|-------------|-------------|-----------------|
| <b>Males 40-49</b>   | <b>7.67</b>     | <b>0.90</b>      | <b>21.5</b> | <b>36.0</b> | <b>£82,000</b>  |
| <b>Males 50-59</b>   | <b>12.30</b>    | <b>1.79</b>      | <b>39.5</b> | <b>53.4</b> | <b>£133,000</b> |
| <b>Males 60-69</b>   | <b>16.94</b>    | <b>2.61</b>      | <b>51.3</b> | <b>60.8</b> | <b>£172,000</b> |
| <b>Males 70-79</b>   | <b>18.24</b>    | <b>2.58</b>      | <b>40.5</b> | <b>44.6</b> | <b>£158,000</b> |
| <b>Females 40-49</b> | <b>6.40</b>     | <b>0.63</b>      | <b>17.3</b> | <b>30.3</b> | <b>£77,000</b>  |
| <b>Females 50-59</b> | <b>7.82</b>     | <b>1.08</b>      | <b>27.1</b> | <b>37.4</b> | <b>£95,000</b>  |
| <b>Females 60-69</b> | <b>10.81</b>    | <b>1.76</b>      | <b>39.1</b> | <b>45.5</b> | <b>£124,000</b> |
| <b>Females 70-79</b> | <b>13.40</b>    | <b>2.01</b>      | <b>37.7</b> | <b>39.5</b> | <b>£130,000</b> |

## Appendix F

Discounted estimates of total England and Wales population effects for an intervention with relative risk reduction of 10% sustained over 10 years

|                      | 000s of cases prevented | 000s of deaths prevented | 000s of Life Years gained | 000s of QALYs gained | Total savings<br>£million | Annual equivalent savings<br>(£millions) |
|----------------------|-------------------------|--------------------------|---------------------------|----------------------|---------------------------|------------------------------------------|
| <b>Males 40-49</b>   | 30                      | 3.5                      | 84                        | 140                  | 319                       | <b>37</b>                                |
| <b>Males 50-59</b>   | 39                      | 5.7                      | 126                       | 170                  | 423                       | <b>49</b>                                |
| <b>Males 60-69</b>   | 43                      | 6.7                      | 131                       | 156                  | 441                       | <b>51</b>                                |
| <b>Males 70-79</b>   | 30                      | 4.3                      | 68                        | 75                   | 264                       | <b>31</b>                                |
| <b>Females 40-49</b> | 26                      | 2.5                      | 69                        | 121                  | 307                       | <b>36</b>                                |
| <b>Females 50-59</b> | 26                      | 3.6                      | 90                        | 124                  | 314                       | <b>36</b>                                |
| <b>Females 60-69</b> | 30                      | 4.8                      | 108                       | 125                  | 343                       | <b>40</b>                                |
| <b>Females 70-79</b> | 27                      | 4.1                      | 76                        | 80                   | 262                       | <b>30</b>                                |
| <b>Totals</b>        | <b>251</b>              | <b>35.2</b>              | <b>751</b>                | <b>990</b>           | <b>2671</b>               | <b>310</b>                               |

Apparent anomalies with the addition are due to rounding effects

**Appendix G Maximum acceptable cost (£million per programme) for intervention with given relative risk**

| Relative risk | For cost saving |               | For £20,000/QALY |               | For £30,000/QALY |               |
|---------------|-----------------|---------------|------------------|---------------|------------------|---------------|
|               | <i>one-off</i>  | <i>annual</i> | <i>one-off</i>   | <i>annual</i> | <i>one-off</i>   | <i>annual</i> |
| 0.999         | 26              | 3             | 223              | 26            | 321              | 37            |
| 0.995         | 132             | 15            | 1115             | 130           | 1607             | 187           |
| 0.99          | 265             | 31            | 2231             | 259           | 3214             | 373           |
| 0.98          | 530             | 62            | 4466             | 519           | 6434             | 747           |
| 0.97          | 796             | 93            | 6705             | 779           | 9659             | 1122          |
| 0.96          | 1063            | 123           | 8947             | 1039          | 12890            | 1497          |
| 0.95          | 1330            | 154           | 11193            | 1300          | 16125            | 1873          |
| 0.94          | 1597            | 186           | 13443            | 1562          | 19366            | 2250          |
| 0.93          | 1865            | 217           | 15697            | 1824          | 22613            | 2627          |
| 0.92          | 2133            | 248           | 17954            | 2086          | 25865            | 3005          |
| 0.91          | 2402            | 279           | 20215            | 2349          | 29122            | 3383          |
| 0.9           | 2671            | 310           | 22480            | 2612          | 32385            | 3762          |
| 0.85          | 4024            | 467           | 33862            | 3934          | 48780            | 5667          |
| 0.8           | 5389            | 626           | 45338            | 5267          | 65313            | 7588          |
| 0.75          | 6766            | 786           | 56911            | 6612          | 81984            | 9524          |
| 0.7           | 8155            | 947           | 68582            | 7967          | 98795            | 11477         |
| 0.65          | 9557            | 1110          | 80350            | 9335          | 115747           | 13447         |
| 0.6           | 10971           | 1275          | 92218            | 10713         | 132842           | 15433         |
| 0.55          | 12397           | 1440          | 104187           | 12104         | 150081           | 17436         |
| 0.5           | 13836           | 1607          | 116256           | 13506         | 167466           | 19455         |

## Appendix H

Maximum acceptable cost (£million per programme) for intervention with given percentage reduction in systolic blood pressure

| Percentage reduction in SBP | Equivalent salt reduction (g/day) | For cost saving |        | For £20,000/QALY |        | For £30,000/QALY |             |
|-----------------------------|-----------------------------------|-----------------|--------|------------------|--------|------------------|-------------|
|                             |                                   | one-off         | annual | one-off          | annual | one-off          | annual      |
| <b>0.5</b>                  | 0.75                              | 86              | 10     | 737              | 86     | 1062             | <b>123</b>  |
|                             | 1.5                               | 173             | 20     | 1476             | 172    | 2128             | <b>247</b>  |
| <b>1.5</b>                  | 2.25                              | 260             | 30     | 2218             | 258    | 3197             | <b>371</b>  |
|                             | 3                                 | 347             | 40     | 2962             | 344    | 4269             | <b>496</b>  |
| <b>2.5</b>                  | 3.75                              | 435             | 50     | 3708             | 431    | 5344             | <b>621</b>  |
|                             | 4.5                               | 522             | 61     | 4456             | 518    | 6423             | <b>746</b>  |
| <b>3.5</b>                  | 5.25                              | 610             | 71     | 5207             | 605    | 7505             | <b>872</b>  |
|                             | 6                                 | 699             | 81     | 5960             | 692    | 8590             | <b>998</b>  |
| <b>4.5</b>                  | 6.75                              | 787             | 91     | 6715             | 780    | 9679             | <b>1124</b> |
|                             | 7.5                               | 876             | 102    | 7473             | 868    | 10771            | <b>1251</b> |



## Appendix I

Maximum acceptable cost (£million per programme) for intervention with given percentage reduction in cholesterol

| Percentage reduction in cholesterol | For cost saving |        | For £20,000/QALY |         | For £30,000/QALY |         |
|-------------------------------------|-----------------|--------|------------------|---------|------------------|---------|
|                                     | one-off         | annual | one-off          | one-off | annual           | one-off |
| 0.5                                 | 68              | 8      | 581              | 67      | 837              | 97      |
| 1                                   | 136             | 16     | 1163             | 135     | 1676             | 195     |
| 1.5                                 | 205             | 24     | 1748             | 203     | 2519             | 293     |
| 2                                   | 274             | 32     | 2334             | 271     | 3365             | 391     |
| 2.5                                 | 343             | 40     | 2923             | 340     | 4213             | 489     |
| 3                                   | 412             | 48     | 3514             | 408     | 5065             | 588     |
| 3.5                                 | 481             | 56     | 4106             | 477     | 5919             | 688     |
| 4                                   | 551             | 64     | 4701             | 546     | 6776             | 787     |
| 4.5                                 | 621             | 72     | 5298             | 616     | 7637             | 887     |
| 5                                   | 691             | 80     | 5897             | 685     | 8501             | 988     |

## APPENDIX J

### Estimated outcomes following a first CVD event

Estimated results for men for the outcomes expected from a primary CVD event at any given age. (A brief explanation is provided in the Methods section).

#### Estimated outcomes for men experiencing a primary CVD event

| Age | Deaths | Undiscounted |         |           | Discounted |         |           |
|-----|--------|--------------|---------|-----------|------------|---------|-----------|
|     |        | Cost         | LY lost | QALY lost | Cost       | LY lost | QALY lost |
| 40  | 0.101  | 19706        | 8.6372  | 13.7326   | 10629      | 2.6403  | 9.6878    |
| 41  | 0.101  | 19351        | 8.3430  | 13.2795   | 10552      | 2.6048  | 9.5464    |
| 42  | 0.101  | 18994        | 8.0523  | 12.8326   | 10473      | 2.5685  | 9.4031    |
| 43  | 0.101  | 18639        | 7.7683  | 12.3958   | 10392      | 2.5317  | 9.2589    |
| 44  | 0.101  | 18281        | 7.4879  | 11.9651   | 10309      | 2.4940  | 9.1127    |
| 45  | 0.101  | 17921        | 7.2112  | 11.5404   | 10223      | 2.4554  | 8.9644    |
| 46  | 0.101  | 17563        | 6.9410  | 11.1255   | 10135      | 2.4163  | 8.8150    |
| 47  | 0.101  | 17202        | 6.6744  | 10.7166   | 10045      | 2.3763  | 8.6635    |
| 48  | 0.101  | 16844        | 6.4144  | 10.3174   | 9953       | 2.3357  | 8.5108    |
| 49  | 0.101  | 16487        | 6.1608  | 9.9277    | 9859       | 2.2945  | 8.3570    |
| 50  | 0.134  | 18404        | 9.0444  | 11.6798   | 11512      | 3.3684  | 7.4314    |
| 51  | 0.134  | 18037        | 8.6665  | 11.2039   | 11398      | 3.3018  | 7.2940    |
| 52  | 0.134  | 17668        | 8.2980  | 10.7402   | 11280      | 3.2344  | 7.1554    |
| 53  | 0.134  | 17295        | 7.9347  | 10.2840   | 11159      | 3.1653  | 7.0144    |
| 54  | 0.134  | 16922        | 7.5809  | 9.8398    | 11034      | 3.0954  | 6.8720    |
| 55  | 0.134  | 16544        | 7.2325  | 9.4031    | 10905      | 3.0238  | 6.7270    |
| 56  | 0.134  | 16170        | 6.8973  | 8.9825    | 10775      | 2.9522  | 6.5818    |
| 57  | 0.134  | 15791        | 6.5674  | 8.5691    | 10640      | 2.8788  | 6.4339    |
| 58  | 0.134  | 15412        | 6.2467  | 8.1671    | 10501      | 2.8045  | 6.2845    |
| 59  | 0.134  | 15029        | 5.9314  | 7.7723    | 10358      | 2.7284  | 6.1321    |
| 60  | 0.160  | 15226        | 8.3164  | 9.1996    | 11297      | 3.8560  | 5.1415    |
| 61  | 0.160  | 14900        | 7.8775  | 8.7258    | 11151      | 3.7397  | 5.0158    |
| 62  | 0.160  | 14579        | 7.4611  | 8.2759    | 11005      | 3.6250  | 4.8909    |
| 63  | 0.160  | 14250        | 7.0515  | 7.8344    | 10853      | 3.5076  | 4.7632    |
| 64  | 0.160  | 13923        | 6.6588  | 7.4111    | 10698      | 3.3907  | 4.6352    |
| 65  | 0.160  | 13593        | 6.2778  | 7.0007    | 10539      | 3.2727  | 4.5055    |
| 66  | 0.160  | 13265        | 5.9134  | 6.6079    | 10377      | 3.1554  | 4.3755    |
| 67  | 0.160  | 12930        | 5.5556  | 6.2228    | 10209      | 3.0356  | 4.2425    |
| 68  | 0.160  | 12596        | 5.2140  | 5.8548    | 10038      | 2.9166  | 4.1093    |
| 69  | 0.160  | 12260        | 4.8837  | 5.4988    | 9862       | 2.7969  | 3.9743    |
| 70  | 0.143  | 12152        | 5.5870  | 5.8086    | 10310      | 3.2301  | 3.4617    |
| 71  | 0.143  | 11873        | 5.2089  | 5.4314    | 10142      | 3.0812  | 3.3425    |
| 72  | 0.143  | 11596        | 4.8540  | 5.0767    | 9973       | 2.9361  | 3.2246    |
| 73  | 0.143  | 11315        | 4.5114  | 4.7344    | 9798       | 2.7907  | 3.1050    |
| 74  | 0.143  | 11034        | 4.1861  | 4.4089    | 9620       | 2.6474  | 2.9853    |
| 75  | 0.143  | 10757        | 3.8828  | 4.1045    | 9442       | 2.5089  | 2.8675    |
| 76  | 0.143  | 10477        | 3.5909  | 3.8113    | 9258       | 2.3708  | 2.7482    |
| 77  | 0.143  | 10197        | 3.3153  | 3.5338    | 9072       | 2.2356  | 2.6294    |
| 78  | 0.143  | 9924         | 3.0601  | 3.2758    | 8888       | 2.1061  | 2.5131    |
| 79  | 0.143  | 9653         | 2.8200  | 3.0323    | 8702       | 1.9801  | 2.3978    |
| 80  | 0.137  | 8372         | 3.2050  | 3.1524    | 7808       | 2.3017  | 2.0231    |

| Age | Deaths | Undiscounted |         |           | Discounted |         |           |
|-----|--------|--------------|---------|-----------|------------|---------|-----------|
|     |        | Cost         | LY lost | QALY lost | Cost       | LY lost | QALY lost |
| 81  | 0.137  | 8193         | 2.9583  | 2.9175    | 7673       | 2.1622  | 1.9269    |
| 82  | 0.137  | 8015         | 2.7267  | 2.6966    | 7537       | 2.0274  | 1.8320    |
| 83  | 0.137  | 7843         | 2.5149  | 2.4937    | 7404       | 1.9005  | 1.7408    |
| 84  | 0.137  | 7673         | 2.3172  | 2.3040    | 7271       | 1.7789  | 1.6517    |
| 85  | 0.137  | 7510         | 2.1380  | 2.1311    | 7142       | 1.6657  | 1.5668    |
| 86  | 0.137  | 7346         | 1.9672  | 1.9662    | 7012       | 1.5551  | 1.4824    |
| 87  | 0.137  | 7176         | 1.8001  | 1.8050    | 6875       | 1.4442  | 1.3965    |
| 88  | 0.137  | 7006         | 1.6412  | 1.6514    | 6736       | 1.3360  | 1.3110    |
| 89  | 0.137  | 6830         | 1.4862  | 1.5014    | 6590       | 1.2278  | 1.2239    |
| 90  | 0.137  | 6700         | 1.3778  | 1.3939    | 6482       | 1.1504  | 1.1586    |

## Appendix K

### Estimated outcomes for women experiencing a primary CVD event

Estimated results for women for the outcomes expected from a primary CVD event at any given age.

| Age | Deaths | Undiscounted |         |           | Discounted |         |           |
|-----|--------|--------------|---------|-----------|------------|---------|-----------|
|     |        | Cost         | LY lost | QALY lost | Cost       | LY lost | QALY lost |
| 40  | 0.091  | 24973        | 8.9440  | 14.2751   | 12359      | 2.5067  | 5.0150    |
| 41  | 0.091  | 24534        | 8.6544  | 13.8265   | 12271      | 2.4764  | 4.9400    |
| 42  | 0.091  | 24092        | 8.3682  | 13.3838   | 12181      | 2.4454  | 4.8641    |
| 43  | 0.091  | 23652        | 8.0885  | 12.9510   | 12090      | 2.4140  | 4.7880    |
| 44  | 0.091  | 23209        | 7.8121  | 12.5241   | 11995      | 2.3818  | 4.7110    |
| 45  | 0.091  | 22763        | 7.5392  | 12.1031   | 11898      | 2.3489  | 4.6332    |
| 46  | 0.091  | 22320        | 7.2726  | 11.6917   | 11799      | 2.3156  | 4.5550    |
| 47  | 0.091  | 21868        | 7.0067  | 11.2824   | 11696      | 2.2811  | 4.4752    |
| 48  | 0.091  | 21423        | 6.7498  | 10.8862   | 11592      | 2.2466  | 4.3957    |
| 49  | 0.091  | 20976        | 6.4964  | 10.4958   | 11485      | 2.2112  | 4.3153    |
| 50  | 0.106  | 21101        | 9.7704  | 12.9985   | 12581      | 3.2153  | 5.2003    |
| 51  | 0.106  | 20708        | 9.3773  | 12.4964   | 12467      | 3.1570  | 5.0959    |
| 52  | 0.106  | 20315        | 8.9937  | 12.0069   | 12350      | 3.0980  | 4.9911    |
| 53  | 0.106  | 19917        | 8.6157  | 11.5252   | 12230      | 3.0376  | 4.8849    |
| 54  | 0.106  | 19514        | 8.2431  | 11.0512   | 12105      | 2.9757  | 4.7773    |
| 55  | 0.106  | 19110        | 7.8802  | 10.5895   | 11977      | 2.9131  | 4.6692    |
| 56  | 0.106  | 18700        | 7.5229  | 10.1354   | 11845      | 2.8490  | 4.5597    |
| 57  | 0.106  | 18295        | 7.1791  | 9.6978    | 11712      | 2.7848  | 4.4506    |
| 58  | 0.106  | 17879        | 6.8370  | 9.2633    | 11572      | 2.7184  | 4.3390    |
| 59  | 0.106  | 17463        | 6.5045  | 8.8407    | 11428      | 2.6511  | 4.2268    |
| 60  | 0.171  | 17915        | 10.2543 | 11.2387   | 12853      | 4.4055  | 5.4347    |
| 61  | 0.171  | 17564        | 9.7532  | 10.7006   | 12705      | 4.2890  | 5.2815    |
| 62  | 0.171  | 17212        | 9.2705  | 10.1825   | 12554      | 4.1722  | 5.1291    |
| 63  | 0.171  | 16853        | 8.7946  | 9.6733    | 12397      | 4.0527  | 4.9744    |
| 64  | 0.171  | 16493        | 8.3369  | 9.1836    | 12237      | 3.9330  | 4.8205    |
| 65  | 0.171  | 16125        | 7.8862  | 8.7026    | 12070      | 3.8105  | 4.6643    |
| 66  | 0.171  | 15754        | 7.4481  | 8.2355    | 11898      | 3.6866  | 4.5075    |
| 67  | 0.171  | 15377        | 7.0226  | 7.7821    | 11721      | 3.5612  | 4.3500    |
| 68  | 0.171  | 14997        | 6.6095  | 7.3423    | 11538      | 3.4345  | 4.1919    |
| 69  | 0.171  | 14613        | 6.2089  | 6.9159    | 11349      | 3.3065  | 4.0331    |
| 70  | 0.152  | 13882        | 7.4244  | 7.4120    | 11536      | 4.0009  | 4.3511    |
| 71  | 0.152  | 13586        | 6.9456  | 6.9501    | 11364      | 3.8320  | 4.1671    |

| Age | Deaths | Undiscounted |         |           | Discounted |         |           |
|-----|--------|--------------|---------|-----------|------------|---------|-----------|
|     |        | Cost         | LY lost | QALY lost | Cost       | LY lost | QALY lost |
| 72  | 0.152  | 13288        | 6.4870  | 6.5080    | 11188      | 3.6638  | 3.9848    |
| 73  | 0.152  | 12982        | 6.0425  | 6.0800    | 11005      | 3.4943  | 3.8022    |
| 74  | 0.152  | 12674        | 5.6180  | 5.6713    | 10818      | 3.3261  | 3.6216    |
| 75  | 0.152  | 12363        | 5.2133  | 5.2815    | 10625      | 3.1593  | 3.4433    |
| 76  | 0.152  | 12050        | 4.8280  | 4.9100    | 10429      | 2.9944  | 3.2674    |
| 77  | 0.152  | 11735        | 4.4618  | 4.5566    | 10228      | 2.8316  | 3.0942    |
| 78  | 0.152  | 11419        | 4.1144  | 4.2208    | 10022      | 2.6712  | 2.9239    |
| 79  | 0.152  | 11102        | 3.7856  | 3.9022    | 9813       | 2.5135  | 2.7569    |
| 80  | 0.147  | 9675         | 4.4439  | 4.0962    | 8925       | 3.0384  | 2.9440    |
| 81  | 0.147  | 9466         | 4.0876  | 3.7784    | 8770       | 2.8511  | 2.7652    |
| 82  | 0.147  | 9254         | 3.7506  | 3.4777    | 8612       | 2.6679  | 2.5909    |
| 83  | 0.147  | 9040         | 3.4325  | 3.1938    | 8449       | 2.4893  | 2.4212    |
| 84  | 0.147  | 8833         | 3.1446  | 2.9359    | 8290       | 2.3224  | 2.2624    |
| 85  | 0.147  | 8621         | 2.8687  | 2.6887    | 8125       | 2.1576  | 2.1060    |
| 86  | 0.147  | 8413         | 2.6159  | 2.4615    | 7962       | 2.0020  | 1.9581    |
| 87  | 0.147  | 8201         | 2.3746  | 2.2444    | 7793       | 1.8491  | 1.8130    |
| 88  | 0.147  | 7990         | 2.1500  | 2.0417    | 7623       | 1.7026  | 1.6739    |
| 89  | 0.147  | 7780         | 1.9415  | 1.8529    | 7452       | 1.5628  | 1.5411    |
| 90  | 0.147  | 7595         | 1.7688  | 1.6946    | 7300       | 1.4440  | 1.4269    |

## Appendix L

### Population estimates for England and Wales: numbers eligible for primary prevention

|                          | Population in<br>000s | CVD prevalence<br>per 1000 | CVD free<br>population in<br>000s |
|--------------------------|-----------------------|----------------------------|-----------------------------------|
| <b>Males 40-<br/>49</b>  | 3927                  | 7.2                        | 3898                              |
| <b>Males 50-<br/>59</b>  | 3257                  | 23.2                       | 3181                              |
| <b>Males 60-<br/>69</b>  | 2659                  | 36.1                       | 2563                              |
| <b>Males 70-<br/>79</b>  | 1748                  | 44.2                       | 1671                              |
| <b>Females<br/>40-49</b> | 3996                  | 3.04                       | 3983                              |
| <b>Females<br/>50-59</b> | 3346                  | 11.0                       | 3309                              |
| <b>Females<br/>60-69</b> | 2815                  | 21.4                       | 2754                              |
| <b>Females<br/>70-79</b> | 2090                  | 34.7                       | 2018                              |

## APPENDIX M

### Illustrative calculations for 65-year-old male with a 12.5% 10-year CVD risk

Table (i) shows the calculations for a 65-year-old man with a 10-year CVD risk of 12.5%. The intervention is assumed to have a relative risk of 0.9 for each of the 10 years modelled.

**Table i** CVD events over 10 years for 65-year-old male with 12.5% 10-year risk

| Age | OC death | no intervention |          | intervention |          | undiscounted | discounted |
|-----|----------|-----------------|----------|--------------|----------|--------------|------------|
|     |          | risk CVD        | CVD free | risk CVD     | CVD free | cas prev     | cas prev   |
| A   | B        | C               | D        | E            | F        | G            | H          |
| 65  | 0.00791  | 0.00819         | 0.98396  | 0.00737      | 0.98477  | 0.00081      | 0.00081    |
| 66  | 0.00844  | 0.01074         | 0.96518  | 0.00967      | 0.96703  | 0.00103      | 0.00100    |
| 67  | 0.00911  | 0.01197         | 0.94493  | 0.01077      | 0.94789  | 0.00111      | 0.00103    |
| 68  | 0.00989  | 0.01285         | 0.92356  | 0.01156      | 0.92766  | 0.00114      | 0.00103    |
| 69  | 0.01052  | 0.01354         | 0.90147  | 0.01219      | 0.90671  | 0.00115      | 0.00100    |
| 70  | 0.01121  | 0.01412         | 0.87878  | 0.01271      | 0.88515  | 0.00113      | 0.00095    |
| 71  | 0.01242  | 0.01462         | 0.85518  | 0.01316      | 0.86266  | 0.00111      | 0.00090    |
| 72  | 0.01341  | 0.01506         | 0.83100  | 0.01356      | 0.83955  | 0.00107      | 0.00084    |
| 73  | 0.01428  | 0.01546         | 0.80647  | 0.01392      | 0.81605  | 0.00103      | 0.00078    |
| 74  | 0.01553  | 0.01582         | 0.78138  | 0.01424      | 0.79194  | 0.00097      | 0.00071    |
|     |          |                 |          |              | totals   | 0.01055      | 0.00906    |

Column A simply shows the age at the start of each year. Column B gives the risk of other causes death in the year, defined as the probability of other causes death conditional on survival to the start of the year. Yearly all-cause death rates have been adjusted for the proportion of CVD deaths to obtain this estimate. Column C is the assumed risk profile in the absence of an intervention, so that (for example) someone who has survived to age 70 without a CVD event has a probability of 0.01412 of a first CVD event in the next year. This is obtained from applying the algorithm of Anderson et al (1991). Column D gives the probability of CVD-free survival to the end of each year. It is calculated by a formula such as  $D_{67} = (1 - B_{67})(1 - C_{67})D_{66}$ , where  $D_{67}$  represents the entry in column D on the row for age 67, and so on. In other words, the CVD-free survival is multiplied each year by two factors, one representing other cause death and a second representing first CVD event. The multiplicative formula allows appropriately for competing risks. Column E is simply calculated as  $E_{65} = 0.9C_{65}$ , and so on, showing the intervention effect. Then column F is calculated as  $F_{67} = (1 - B_{67})(1 - E_{67})F_{66}$ , by analogy with column D. Next, the estimated cases prevented each year are calculated by a formula such as  $G_{67} = (D_{66} - D_{67}) - (F_{66} - F_{67})$ .

Finally, column H gives the discounted figure from column G at a rate of 3.5% as required by NICE. For example,  $H_{67} = G_{67} / (1.035^2)$ .

For the alternative risk-factor modification version of the model, the annual risk of CVD in column E is calculated directly from the modified risk equation instead of working in terms of column C.

## APPENDIX N

### Undiscounted outcomes for 65-year-old male with a 12.5% 10-year CVD risk

Undiscounted outcomes for 65-year-old male with a 12.5% 10-year CVD risk

| Age    | Cases prevented | Deaths prevented | LY gain | QALY gain | Cost saved |
|--------|-----------------|------------------|---------|-----------|------------|
| 65     | 0.00081         | 0.00013          | 0.0051  | 0.0057    | 11         |
| 66     | 0.00103         | 0.00017          | 0.0061  | 0.0068    | 14         |
| 67     | 0.00111         | 0.00018          | 0.0062  | 0.0069    | 14         |
| 68     | 0.00114         | 0.00018          | 0.0059  | 0.0067    | 14         |
| 69     | 0.00115         | 0.00018          | 0.0056  | 0.0063    | 14         |
| 70     | 0.00113         | 0.00016          | 0.0063  | 0.0066    | 14         |
| 71     | 0.00111         | 0.00016          | 0.0058  | 0.0060    | 13         |
| 72     | 0.00107         | 0.00015          | 0.0052  | 0.0054    | 12         |
| 73     | 0.00103         | 0.00015          | 0.0046  | 0.0049    | 12         |
| 74     | 0.00097         | 0.00014          | 0.0041  | 0.0043    | 11         |
| Totals | 0.01055         | 0.00160          | 0.0549  | 0.0596    | 129        |

## APPENDIX O

### Discounted outcomes for 65-year-old male with a 12.5% 10-year CVD risk

Discounted outcomes for 65-year-old male with a 12.5% 10-year CVD risk

| Age    | Cases prevented | Deaths prevented | LY gain | QALY gain | Cost saved |
|--------|-----------------|------------------|---------|-----------|------------|
| 65     | 0.00081         | 0.00013          | 0.0027  | 0.0032    | 9          |
| 66     | 0.00100         | 0.00016          | 0.0031  | 0.0038    | 10         |
| 67     | 0.00103         | 0.00017          | 0.0031  | 0.0038    | 11         |
| 68     | 0.00103         | 0.00016          | 0.0030  | 0.0036    | 10         |
| 69     | 0.00100         | 0.00016          | 0.0028  | 0.0034    | 10         |
| 70     | 0.00095         | 0.00014          | 0.0031  | 0.0035    | 10         |
| 71     | 0.00090         | 0.00013          | 0.0028  | 0.0031    | 9          |
| 72     | 0.00084         | 0.00012          | 0.0025  | 0.0028    | 8          |
| 73     | 0.00078         | 0.00011          | 0.0022  | 0.0025    | 8          |
| 74     | 0.00071         | 0.00010          | 0.0019  | 0.0021    | 7          |
| Totals | 0.00906         | 0.00138          | 0.0271  | 0.0319    | 92         |



## APPENDIX P.

### LIFE EXPECTANCY CALCULATIONS

Suppose an individual has an annual risk of mortality  $\lambda$ . Then the probability of survival at time  $t$  is  $e^{-\lambda t}$ , so the life expectancy is  $\int_0^{\infty} e^{-\lambda t} dt = \left[ \frac{-1}{\lambda} e^{-\lambda t} \right]_0^{\infty} = \frac{1}{\lambda}$ . Thus a known life expectancy can be approximated by an annual risk equal to the reciprocal of the life expectancy.

Now suppose the individual has additional mortality  $\mu$  in the first year and  $\nu$  in subsequent years. Then the life expectancy can be approximated as

$$\int_0^1 e^{-(\lambda+\mu)t} dt + \int_1^{\infty} e^{-(\lambda+\mu)} e^{-(\lambda+\nu)(t-1)} dt = \frac{1 - e^{-(\lambda+\mu)}}{\lambda + \mu} + \frac{e^{-(\lambda+\mu)}}{\lambda + \nu} = \frac{\lambda + \nu + e^{-(\lambda+\mu)}(\mu - \nu)}{(\lambda + \mu)(\lambda + \nu)}.$$

Now  $e^{-(\lambda+\mu)} \approx 1 - (\lambda + \mu)$ , so the life expectancy can be approximated by

$$\begin{aligned} \frac{\lambda + \nu + (1 - \lambda - \mu)(\mu - \nu)}{(\lambda + \mu)(\lambda + \nu)} &= \frac{\lambda + \nu + \mu - \nu - \lambda\mu + \lambda\nu - \mu^2 + \mu\nu}{(\lambda + \mu)(\lambda + \nu)} \\ &= \frac{\lambda + \mu + \lambda\nu + \mu\nu - \lambda\mu - \mu^2}{(\lambda + \mu)(\lambda + \nu)} = \frac{(\lambda + \mu)(1 + \nu - \mu)}{(\lambda + \mu)(\lambda + \nu)} = \frac{1 + \nu - \mu}{(\lambda + \nu)}. \end{aligned}$$

This is the formula used to estimate the life expectancy following a particular CVD event.

For discounted life expectancy, note that applying an annual discount rate of  $\rho$  effectively multiplies the value of survival at time  $t$  by  $e^{-\rho t}$ . Thus if the undiscounted life expectancy is

$$\frac{1}{\lambda}, \text{ then the discounted life expectancy may be approximated by } \int_0^{\infty} e^{-\lambda t} e^{-\rho t} dt = \frac{1}{\lambda + \rho}.$$

The approximations used in developing these formulae are well within the range of reasonable modelling approximations given the assumptions made in other parts of the model.

## SENSITIVITY ANALYSES

### APPENDIX Q..

**SENSITIVITY ANALYSIS: Discounted outcomes for an intervention achieving a given relative risk reduction sustained over 10 years (all background risks INCREASED by 5%)**

| <b>Relative risk reduction</b> | <b>Cases prevented</b> | <b>Deaths prevented</b> | <b>Life years gained</b> | <b>QALYs gained</b> | <b>Total savings</b> | <b>Annual equivalent savings</b> |
|--------------------------------|------------------------|-------------------------|--------------------------|---------------------|----------------------|----------------------------------|
|                                | (000)                  | (000)                   | (000)                    | (000)               | (£millions)          | (£millions)                      |
| <b>0.001</b>                   | 3                      | 0.5                     | 10                       | 13                  | 35                   | 4                                |
| <b>0.005</b>                   | 16                     | 2.3                     | 49                       | 66                  | 177                  | 15                               |
| <b>0.01</b>                    | 33                     | 4.5                     | 98                       | 133                 | 354                  | 41                               |
| <b>0.02</b>                    | 66                     | 9.1                     | 197                      | 266                 | 708                  | 82                               |
| <b>0.03</b>                    | 99                     | 14                      | 296                      | 399                 | 1064                 | 124                              |
| <b>0.04</b>                    | 132                    | 18                      | 395                      | 533                 | 1420                 | 165                              |
| <b>0.05</b>                    | 165                    | 23                      | 494                      | 666                 | 1776                 | 206                              |
| <b>0.06</b>                    | 199                    | 27                      | 594                      | 800                 | 2134                 | 248                              |
| <b>0.07</b>                    | 232                    | 32                      | 694                      | 935                 | 2492                 | 290                              |
| <b>0.08</b>                    | 265                    | 37                      | 793                      | 1069                | 2851                 | 331                              |
| <b>0.09</b>                    | 299                    | 41                      | 894                      | 1204                | 3211                 | 373                              |
| <b>0.1</b>                     | 333                    | 46                      | 994                      | 1340                | 3572                 | 415                              |
| <b>0.15</b>                    | 502                    | 69                      | 1500                     | 2020                | 5387                 | 626                              |
| <b>0.2</b>                     | 673                    | 93                      | 2011                     | 2707                | 7222                 | 839                              |
| <b>0.25</b>                    | 846                    | 117                     | 2528                     | 3401                | 9076                 | 1054                             |
| <b>0.3</b>                     | 1021                   | 141                     | 3051                     | 4103                | 10951                | 1272                             |
| <b>0.35</b>                    | 1198                   | 165                     | 3579                     | 4811                | 12846                | 1492                             |
| <b>0.4</b>                     | 1377                   | 190                     | 4114                     | 5527                | 14762                | 1715                             |
| <b>0.45</b>                    | 1558                   | 215                     | 4655                     | 6251                | 16698                | 1940                             |
| <b>0.5</b>                     | 1741                   | 241                     | 5202                     | 6982                | 18656                | 2167                             |

**APPENDIX R****SENSITIVITY ANALYSIS: Discounted outcomes for an intervention achieving a given relative risk reduction sustained over 10 years (all background risks multiplied by 1.5)**

| <b>Relative risk reduction</b> | <b>Cases prevented</b> | <b>Deaths prevented</b> | <b>Life years gained</b> | <b>QALYs gained</b> | <b>Total savings</b> | <b>Annual equivalent savings</b> |
|--------------------------------|------------------------|-------------------------|--------------------------|---------------------|----------------------|----------------------------------|
|                                | (000)                  | (000)                   | (000)                    | (000)               | (£millions)          | (£millions)                      |
| <b>0.001</b>                   | 4                      | 0.5                     | 11                       | 14                  | 38                   | 4                                |
| <b>0.005</b>                   | 18                     | 2.5                     | 53                       | 71                  | 191                  | 15                               |
| <b>0.01</b>                    | 36                     | 5.0                     | 107                      | 143                 | 382                  | 44                               |
| <b>0.02</b>                    | 71                     | 10.0                    | 214                      | 286                 | 766                  | 89                               |
| <b>0.03</b>                    | 107                    | 15                      | 322                      | 429                 | 1150                 | 134                              |
| <b>0.04</b>                    | 143                    | 20                      | 429                      | 573                 | 1536                 | 178                              |
| <b>0.05</b>                    | 179                    | 25                      | 537                      | 717                 | 1923                 | 223                              |
| <b>0.06</b>                    | 216                    | 30                      | 646                      | 862                 | 2310                 | 268                              |
| <b>0.07</b>                    | 252                    | 35                      | 755                      | 1007                | 2699                 | 314                              |
| <b>0.08</b>                    | 288                    | 40                      | 864                      | 1152                | 3089                 | 359                              |
| <b>0.09</b>                    | 325                    | 45                      | 973                      | 1298                | 3480                 | 404                              |
| <b>0.1</b>                     | 362                    | 50                      | 1083                     | 1444                | 3872                 | 450                              |
| <b>0.15</b>                    | 547                    | 76                      | 1636                     | 2181                | 5850                 | 680                              |
| <b>0.2</b>                     | 734                    | 103                     | 2198                     | 2927                | 7855                 | 913                              |
| <b>0.25</b>                    | 925                    | 129                     | 2767                     | 3684                | 9889                 | 1149                             |
| <b>0.3</b>                     | 1118                   | 156                     | 3346                     | 4451                | 11953                | 1389                             |
| <b>0.35</b>                    | 1315                   | 184                     | 3933                     | 5228                | 14046                | 1632                             |
| <b>0.4</b>                     | 1514                   | 212                     | 4528                     | 6015                | 16169                | 1878                             |
| <b>0.45</b>                    | 1717                   | 240                     | 5133                     | 6814                | 18322                | 2129                             |
| <b>0.5</b>                     | 1922                   | 269                     | 5747                     | 7623                | 20507                | 2382                             |

**APPENDIX S****SENSITIVITY ANALYSIS: Discounted outcomes for an intervention achieving a given relative risk reduction sustained over 10 years (all background risks REDUCED by 5%)**

| <b>Relative risk reduction</b> | <b>Cases prevented</b> | <b>Deaths prevented</b> | <b>Life years gained</b> | <b>QALYs gained</b> | <b>Total savings</b> | <b>Annual equivalent savings</b> |
|--------------------------------|------------------------|-------------------------|--------------------------|---------------------|----------------------|----------------------------------|
|                                | (000)                  | (000)                   | (000)                    | (000)               | (£millions)          | (£millions)                      |
| <b>0.001</b>                   | 2                      | 0.2                     | 5                        | 6                   | 17                   | 2                                |
| <b>0.005</b>                   | 8                      | 1.2                     | 25                       | 31                  | 86                   | 15                               |
| <b>0.01</b>                    | 17                     | 2.4                     | 49                       | 63                  | 172                  | 20                               |
| <b>0.02</b>                    | 33                     | 4.8                     | 98                       | 125                 | 345                  | 40                               |
| <b>0.03</b>                    | 50                     | 7                       | 148                      | 188                 | 518                  | 60                               |
| <b>0.04</b>                    | 66                     | 10                      | 197                      | 251                 | 691                  | 80                               |
| <b>0.05</b>                    | 83                     | 12                      | 247                      | 313                 | 864                  | 100                              |
| <b>0.06</b>                    | 100                    | 14                      | 296                      | 376                 | 1038                 | 121                              |
| <b>0.07</b>                    | 116                    | 17                      | 346                      | 439                 | 1212                 | 141                              |
| <b>0.08</b>                    | 133                    | 19                      | 396                      | 503                 | 1386                 | 161                              |
| <b>0.09</b>                    | 150                    | 22                      | 446                      | 566                 | 1560                 | 181                              |
| <b>0.1</b>                     | 166                    | 24                      | 495                      | 629                 | 1735                 | 202                              |
| <b>0.15</b>                    | 251                    | 36                      | 746                      | 947                 | 2612                 | 303                              |
| <b>0.2</b>                     | 336                    | 48                      | 999                      | 1267                | 3496                 | 406                              |
| <b>0.25</b>                    | 421                    | 61                      | 1253                     | 1589                | 4387                 | 510                              |
| <b>0.3</b>                     | 507                    | 73                      | 1509                     | 1914                | 5284                 | 614                              |
| <b>0.35</b>                    | 594                    | 85                      | 1768                     | 2241                | 6188                 | 719                              |
| <b>0.4</b>                     | 682                    | 98                      | 2028                     | 2570                | 7099                 | 825                              |
| <b>0.45</b>                    | 771                    | 111                     | 2291                     | 2902                | 8017                 | 931                              |
| <b>0.5</b>                     | 860                    | 124                     | 2555                     | 3236                | 8942                 | 1039                             |

**APPENDIX T****SENSITIVITY ANALYSIS: Discounted outcomes for an intervention achieving a given relative risk reduction sustained over 10 years (all background risks multiplied by 0.5, ie halved)**

| <b>Relative risk reduction</b> | <b>Cases prevented</b> | <b>Deaths prevented</b> | <b>Life years gained</b> | <b>QALYs gained</b> | <b>Total savings</b> | <b>Annual equivalent savings</b> |
|--------------------------------|------------------------|-------------------------|--------------------------|---------------------|----------------------|----------------------------------|
|                                | (000)                  | (000)                   | (000)                    | (000)               | (£millions)          | (£millions)                      |
| <b>0.001</b>                   | 1                      | 0.2                     | 4                        | 5                   | 14                   | 2                                |
| <b>0.005</b>                   | 7                      | 0.9                     | 19                       | 25                  | 69                   | 15                               |
| <b>0.01</b>                    | 13                     | 1.8                     | 39                       | 51                  | 138                  | 16                               |
| <b>0.02</b>                    | 26                     | 3.7                     | 78                       | 102                 | 275                  | 32                               |
| <b>0.03</b>                    | 39                     | 5                       | 117                      | 153                 | 413                  | 48                               |
| <b>0.04</b>                    | 52                     | 7                       | 156                      | 204                 | 551                  | 64                               |
| <b>0.05</b>                    | 65                     | 9                       | 195                      | 255                 | 689                  | 80                               |
| <b>0.06</b>                    | 78                     | 11                      | 234                      | 306                 | 827                  | 96                               |
| <b>0.07</b>                    | 91                     | 13                      | 273                      | 357                 | 966                  | 112                              |
| <b>0.08</b>                    | 104                    | 15                      | 312                      | 408                 | 1104                 | 128                              |
| <b>0.09</b>                    | 117                    | 17                      | 352                      | 459                 | 1243                 | 144                              |
| <b>0.1</b>                     | 131                    | 18                      | 391                      | 510                 | 1381                 | 160                              |
| <b>0.15</b>                    | 196                    | 28                      | 588                      | 767                 | 2076                 | 241                              |
| <b>0.2</b>                     | 262                    | 37                      | 785                      | 1024                | 2774                 | 322                              |
| <b>0.25</b>                    | 329                    | 46                      | 983                      | 1283                | 3475                 | 404                              |
| <b>0.3</b>                     | 395                    | 56                      | 1183                     | 1542                | 4178                 | 485                              |
| <b>0.35</b>                    | 462                    | 65                      | 1383                     | 1803                | 4885                 | 567                              |
| <b>0.4</b>                     | 529                    | 74                      | 1584                     | 2064                | 5594                 | 650                              |
| <b>0.45</b>                    | 597                    | 84                      | 1785                     | 2327                | 6306                 | 733                              |
| <b>0.5</b>                     | 664                    | 93                      | 1988                     | 2590                | 7021                 | 816                              |

## APPENDIX U

### Principles of the SchARR model incorporated into this modelling

Primary CVD events can be classified as:

- Stable angina
- Unstable angina
- Myocardial infarction (non fatal)
- Fatal Coronary Heart Disease
- Transient Ischaemic Attack
- Stroke (non fatal)
- Fatal CVD (excluding CHD)

The proportion of each type of event depends on age and sex.

For each type of non-fatal event, there is an additional annual mortality and an appropriate reduction in quality of life for survivors. There is also an immediate cost of treatment and an expected annual cost of maintenance therapy (including secondary prevention) for survivors.

Using data published in the SchARR model report, we estimated the discounted quality adjusted life expectancy and lifetime costs following each type of non-fatal event, as a function of age and sex. Comparing these with the discounted quality adjusted life expectancy in the absence of a primary CVD event, we were able to estimate the cost saving and QALY gain for each event prevented, also as a function of age and sex.

The quality of life data used in the model for each type of non-fatal event were as follows:

| Event type            | QoL following event |
|-----------------------|---------------------|
| Stable Angina         | 0.808               |
| Unstable Angina       | 0.770               |
| Myocardial Infarction | 0.760               |
| TIA                   | 1.000               |
| Stroke                | 0.629               |

Source: Ward *et al*<sup>16</sup>, p. 153

<http://www.nice.org.uk/nicemedia/live/11563/33142/33142.pdf>

These were taken as multipliers for population quality of life data as follows:

| Age | Population norm for quality of life |
|-----|-------------------------------------|
| 45  | 0.869                               |
| 50  | 0.848                               |
| 55  | 0.826                               |
| 60  | 0.805                               |
| 65  | 0.784                               |
| 70  | 0.763                               |
| 75  | 0.741                               |
| 80  | 0.72                                |
| 85  | 0.699                               |
| 90  | 0.678                               |

Source: Ward *et al*<sup>16</sup>, p. 151

<http://www.nice.org.uk/nicemedia/live/11563/33142/33142.pdf>
